# Supplementary material for: Screening of endogenous strong promoters for enhanced production of medium-chain-length polyhydroxyalkanoates in Pseudomonas mendocina NK-01
Source: PubMed Central journal article supplement (PMC6372614; doi:10.1038/s41598-019-39321-z), 2019-02-12
Supplement: 41598_2019_39321_MOESM1_ESM.pdf [file 41598_2019_39321_MOESM1_ESM.pdf]

## Supplemental materials

**Screening of endogenous strong promoters for enhanced production of  
medium-chain-length polyhydroxyalkanoates in *Pseudomonas mendocina* NK-01**

**Fengjie Zhao,<sup>1</sup> Xiangsheng Liu,<sup>1</sup> Annie Kong,<sup>1</sup> Yuxin Zhao,<sup>1</sup> Xu Fan,<sup>1</sup> Ting Ma,<sup>1</sup>  
Weixia Gao,<sup>2\*</sup> Shufang Wang,<sup>2\*</sup> Chao Yang<sup>1\*</sup>**

<sup>1</sup>Key Laboratory of Molecular Microbiology and Technology for Ministry of Education, Nankai University, Tianjin 300071, China

<sup>2</sup>State Key Laboratory of Medicinal Chemical Biology, Nankai University, Tianjin 300071, China

Correspondence to:

Weixia Gao

Tel./Fax: +86 22 23503753

E-mail: watersave@126.com

Shufang Wang

Tel./Fax: +86 22 23503753

E-mail: wangshufang@nankai.edu.cn

Chao Yang

Tel./Fax: +86 22 23503866

E-mail: yangc20119@nankai.edu.cn

**Table S1** The top 30 genes ranked by transcriptional level based on their RPKM values in RNA-seq analysis

**Table S2** The molecular weights of mcl-PHAs synthesized by *P. mendocina* NKU and its mutants

**Table S3** The monomer composition ratios of mcl-PHA synthesized by *P. mendocina* NKU and its mutants

**Table S4** Primers used in this study

**Fig. S1** Cloned promoter sequences and predicted promoter sequences

**Fig. S2** The growth curves of all the constructed strains for promoter characterization

**Fig. S3** Transcriptional levels of the five strong promoters and *lac* promoter in different growth phases

**Fig. S4** GC-MS analysis for the monomer compositions of mcl-PHA synthesized by *P. mendocina* NKU and its mutants

**Fig. S5** The molecular structure of mcl-PHA produced by *P. mendocina* NK-01

**Fig. S6** Transcriptional levels of *phaC1* and *phaC2* for the different mutant strains at 12 h and 24 h.

**Table S1** The top 30 genes ranked by transcriptional level based on their RPKM values in RNA-seq analysis

| Gene ID  | Productions                                          | Promoters | RPKM     |
|----------|------------------------------------------------------|-----------|----------|
| MDS_4427 | hypothetical protein                                 | P1        | 36681.95 |
| MDS_r003 | 16S ribosomal RNA                                    | P2        | 33511.23 |
| MDS_1604 | hypothetical protein                                 | P3        | 29531.20 |
| MDS_2118 | hypothetical protein                                 | P4        | 24593.43 |
| MDS_1524 | anti sigma-E protein,RseA                            | P5        | 24300.80 |
| MDS_0756 | hypothetical protein                                 | P6        | 24066.04 |
| MDS_2424 | general stress protein                               | P7        | 19061.06 |
| MDS_3781 | hypothetical protein                                 | P8        | 17212.90 |
| MDS_3450 | hypothetical protein                                 | P9        | 16182.31 |
| MDS_3307 | hypothetical protein                                 | P10       | 15688.80 |
| MDS_4616 | hypothetical protein                                 | P11       | 14094.26 |
| MDS_1176 | UspA domain-containing protein                       | P12       | 13610.24 |
| MDS_1400 | hypothetical protein                                 | P13       | 13273.27 |
| MDS_2117 | hypothetical protein                                 | P14       | 10945.60 |
| MDS_3417 | glyoxalase/bleomycin resistance protein/dioxygenase  | P15       | 9162.63  |
| MDS_2531 | alcohol dehydrogenase                                | P16       | 8949.33  |
| MDS_0957 | ribosomal protein S30P / sigma 54 modulation protein | P17       | 8412.46  |
| MDS_0563 | poly(hydroxyalkanoate) granule-associated protein    | P18       | 8222.26  |
| MDS_2561 | DNA-binding transcriptional activator                | P19       | 7903.00  |
| MDS_1497 | 17 kDa surface antigen/outer membrane lipoprotein    | P20       | 7267.13  |
| MDS_3574 | PfpI family intracellular peptidase                  | P21       | 7239.34  |
| MDS_4560 | hypothetical protein                                 | P22       | 7213.88  |
| MDS_1161 | arginine/ornithine antiporter                        | P23       | 6935.83  |
| MDS_2084 | hypothetical protein                                 | P24       | 6818.40  |
| MDS_4257 | outer membrane protein W                             | P25       | 6637.68  |
| MDS_1159 | ornithine carbamoyltransferase                       | P26       | 6455.59  |
| MDS_2628 | OmpF family protein                                  | P27       | 5967.23  |
| MDS_0564 | poly(hydroxyalkanoate) granule-associated protein    | P28       | 5905.14  |
| MDS_3908 | transport-associated protein                         | P29       | 5888.12  |
| MDS_2110 | transglutaminase domain-containing protein           | P30       | 5796.17  |

**Table S2** The molecular weights of mcl-PHAs synthesized by *P. mendocina* NKU and its mutants

| Strains                         | $M_w/ \times 10^4$ Da | $M_n/ \times 10^4$ Da | $M_w/M_n$ |
|---------------------------------|-----------------------|-----------------------|-----------|
| NKU                             | 25.2                  | 14.3                  | 1.76      |
| NKU- $\Delta$ <i>phaZ</i>       | 22.5                  | 15.8                  | 1.42      |
| NKU- $\Delta$ <i>phaZ</i> -4C1  | 18.8                  | 13.3                  | 1.41      |
| NKU- $\Delta$ <i>phaZ</i> -6C1  | 29.1                  | 15.1                  | 1.93      |
| NKU- $\Delta$ <i>phaZ</i> -16C1 | 17.5                  | 11.7                  | 1.50      |

**Table S3** The monomer composition ratios of mcl-PHA synthesized by *P. mendocina*

NKU and its mutants

| Strains                         | Monomer composition (%) |       |      |
|---------------------------------|-------------------------|-------|------|
|                                 | C8                      | C10   | C12  |
| NKU                             | 17.87                   | 77.84 | 4.29 |
| NKU- $\Delta$ <i>phaZ</i>       | 16.27                   | 79.35 | 4.38 |
| NKU- $\Delta$ <i>phaZ</i> -4C1  | 19.38                   | 74.39 | 6.23 |
| NKU- $\Delta$ <i>phaZ</i> -6C1  | 22.13                   | 73.41 | 4.46 |
| NKU- $\Delta$ <i>phaZ</i> -16C1 | 15.11                   | 79.86 | 5.03 |

**Table S4** Primers used in this study

| Primers           | Description                                           | Source or literature |
|-------------------|-------------------------------------------------------|----------------------|
| P4-F              | TATAGGGCGAATTGGAGCTCGGTACCGAGGTTTCTGTGGTGAGCA         | This work            |
| P4-R              | ATGAATTCGCCTCCTGAATTCGTGGGCGTGTGAGCTTGG               | This work            |
| <i>gfp</i> -P4-F  | CACGCCACGAATTCAGGAGGCGAATTCATGAGTAAAGGAGAAGAAC        | This work            |
| P6-F              | TATAGGGCGAATTGGAGCTCGGTACCGGCTGAAGCGGCCTCCT           | This work            |
| P6-R              | ATGAATTCGCCTCCTGAATTCGTGGGGAGTAATAAGTGGCTTC           | This work            |
| <i>gfp</i> -P6-F  | CTCCCCAACGAATTCAGGAGGCGAATTCATGAGTAAAGGAGAAGAAC       | This work            |
| P9-F              | TATAGGGCGAATTGGAGCTCGGTACCCCTGCTGCGCCTTTCACAAGAC      | This work            |
| P9-R              | ATGAATTCGCCTCCTGAATTCAGCGGGTGTGGTTGGGTATG             | This work            |
| <i>gfp</i> -P9-F  | AACCCCGCTGAATTCAGGAGGCGAATTCATGAGTAAAGGAGAAGAAC       | This work            |
| P16-F             | TATAGGGCGAATTGGAGCTCGGTACCATCCGAGGGATACGGCCTTGTGTC    | This work            |
| P16-R             | ATGAATTCGCCTCCTGAATTCGAGCTTGATCGCGGATTAACAC           | This work            |
| <i>gfp</i> -16-F  | ATGAATTCGCCTCCTGAATTCGAGCTTGATCGCGGATTAACAC           | This work            |
| P17-F             | TATAGGGCGAATTGGAGCTCGGTACCGCCAGATCGACTGAAGGCACAAG     | This work            |
| P17-R             | ATGAATTCGCCTCCTGAATTCGTTCCTGTGTAAAGAGACG              | This work            |
| <i>gfp</i> -17-F  | CAAGGCAACGAATTCAGGAGGCGAATTCATGAGTAAAGGAGAAGAAC       | This work            |
| P18-F             | TATAGGGCGAATTGGAGCTCGGTACC AGCTCAAGCGGCAAGCCAC        | This work            |
| P18-R             | ATGAATTCGCCTCCTGAATTCGACAGTTAGCGGAAACGCCAC            | This work            |
| <i>gfp</i> -18-F  | CTAACTGTGCAATTCAGGAGGCGAATTCATGAGTAAAGGAGAAGAAC       | This work            |
| P20-F             | TATAGGGCGAATTGGAGCTCCAGGACGAACCTAGCTGAAC              | This work            |
| P20-R             | ATGAATTCGCCTCCTGAATTCGAATTCAGAGGTATCCTGATCCATTAG      | This work            |
| <i>gfp</i> -20-F  | GATACCTCTGAATTCAGGAGGCGAATTCATGAGTAAAGGAGAAGAAC       | This work            |
| P23-F             | TATAGGGCGAATTGGAGCTCGGTACCCGTGGAAGCTGGCTGAAAG         | This work            |
| P23-R             | ATGAATTCGCCTCCTGAATTCGTATCACAGGGAGACATAGG             | This work            |
| <i>gfp</i> -P23-F | CTGTGATACGAATTCAGGAGGCGAATTCATGAGTAAAGGAGAAGAAC       | This work            |
| P25-F             | TATAGGGCGAATTGGAGCTCGGTACC GCGCAGAGGGTCTCGACAG        | This work            |
| P25-R             | ATGAATTCGCCTCCTGAATTCGAGTTCGGTTGTGTGTTCTTG            | This work            |
| <i>gfp</i> -P25-F | AACCGACTCGAATTCAGGAGGCGAATTCATGAGTAAAGGAGAAGAAC       | This work            |
| P29-F             | TATAGGGCGAATTGGAGCTCGGTACC GCACGGTTAGCCTGTTCG         | This work            |
| P29-R             | ATGAATTCGCCTCCT GAATTCGTACATTCCAGACAATCTGC            | This work            |
| <i>gfp</i> -P29-F | GGAATGTACGAATTCAGGAGGCGAATTCATGAGTAAAGGAGAAGAAC       | This work            |
| <i>gfp</i> -R     | CCGCCACCGCGGTGGAGCTCCTATTGTATAGTTCATCCATG             | This work            |
| <i>gfp-lac</i> -F | GCCGCCACCGCGGTGGAGCTCAGGAGGCGAATTCATGAGTAAAGGAGAAGAAC | This work            |
| <i>gfp-lac</i> -R | TATAGGGCGAATTGGAGCTCCTATTGTATAGTTCATCCATG             | This work            |
| <i>phaC1</i> -PUF | CGCGGATCCGCCGAAGACGGCATCAAG                           | This work            |
| <i>phaC1</i> -PUR | GAATTCATGACTAGGTACCGAGTCGCGCACTGGCCGTGTTT             | This work            |
| <i>phaC1</i> -PDF | GGTACCTAGTCATGTAGAATTCAGGACATTGGAGCGTCGTAG            | This work            |
| <i>phaC1</i> -PDR | CGCGGATCCAGGTCAGGCATTGACTTTAG                         | This work            |
| <i>phaZ</i> -UF   | CAGGTCGACTCTAGAGGATCCTTCCTCGACGGCTTGACGTAAC           | This work            |
| <i>phaZ</i> -UR   | GCCGCAACCATTCTGGTTCCGCCAGCATTGAC                      | This work            |
| <i>phaZ</i> -DF   | CAATGCTGGCGAACCACGAATGTTGCGGCATGGG                    | This work            |
| <i>phaZ</i> -DR   | GAGCTCGGTACCCGGGATCCACCGGCAGCAAAGACGTGAAC             | This work            |

---

|                  |                      |           |
|------------------|----------------------|-----------|
| <i>gfp</i> -QF   | TGCACTACTGGAAACTACC  | This work |
| <i>gfp</i> -QR   | ACTCGATGCGATTAACAAGG | This work |
| <i>phaC1</i> -QF | GGCACTCAAACAACCCTTCC | This work |
| <i>phaC1</i> -QR | TCACCGTCTTCGGGCTTAG  | This work |
| <i>phaZ</i> -QF  | TGGTGCCACTGCTGATCTTC | This work |
| <i>phaZ</i> -QR  | TGGCCGTAGTCGAGGTAATC | This work |
| <i>phaC2</i> -QF | GCACCTCAATCCCTTCTATC | This work |
| <i>phaC2</i> -QR | TGTTGAACAGCTCCTTTACC | This work |
| 16S-QF           | TCACGATTACTAGCGATTCC | This work |
| 16S-QR           | AACCCTTGTCCTTAGTTACC | This work |

---

**P4:**

GAGGTTTCCTGTGGTGAGCACGGAGTGC GGGTGATTTGTGCGTTTTACTTAACACATGAACCTGCACA  
AAGGAATAGCCGGGCCTGATTTTCAAACATATTCGCGCGCTCTTCCCCCTGTGCAACGCCTCGAACGAT  
CGTCAATTAATAATTTACAACGCAAGCGTACGCCAGTGCCGGATCGAATCACCATCAGCCGCCTCGATAG  
TTACCATGCACACCATTCACTTCTGTGATTGCCAGAGCGCGAGGAATATCGACACATCGGGCAGTCGCC  
CTCATCGCACAGAAGGAAACCGATCATGAGCATCTACGCCGCACTCGCCAGCTTCGCCGCCGCTCCG  
CCTTCCAGACCGCTGCACCGGTTCTGTCCTCCGAGCAGGCCGAGCCGCTGCTCGCGACACTCGTCCAAG  
CTGACACGCCAC

**Start End Score Predicted promoter sequences:**

173 218 0.56 TGCCGGATCGAATCACCATCAGCCGCCTCGATAGTTACCA<sup>T</sup>GCACACCAT

**P6:**

GGGTGAAGCGGCCTCCTGGGACTGCTGAAGAGGACGGATCGAGCTCGACCCGCGAGGGCCGCCAAG  
CATACGCGTGCCGAACGCTCAGCGCGACGCCTTGCGAAACACCCGCCGCCAGGCTTGACACTCAGCC  
AGAAGCACCGAGATAGAGCGCCCCGATCAAGTATTGAGGGGATCGATGTTCACTATCAGGTCAGTCA  
AGTTCTTATCTTCGCTCATGTCTCAAGAATTGGCTCCGAAGCCACTTATTACTCCCCAAC

**Start End Score Predicted promoter sequences:**

178 223 0.82 GATGTTCACTATCAGGTCAGTCAAGTTCTTATCTTCGCTC<sup>A</sup>TGTCCTCAA

**P9:**

CCGCTGCGCCACGGCCGCTCCGGCCGTGGCCTGCTGCGCCTTTCACAAGACCTTGAGCGCTCTATTTTC  
GGGCGTTTCAGCAAGCATCAGCGGCATCGATGTTACCATCATGCCAATGAAGTTCTCTGAAAAAAT  
CCAGTGCGTAACATCTGCTC CATACCCAACCACAACCCCGCT

**Start End Score Predicted promoter sequences:**

115 160 0.65 AATGAAGTTCTCTGAAAAAATCCAGTGCGTAACATCTGCTC<sup>C</sup>CATACCCA

**P16:**

ATCCGAGGGATACGGGCCTTGTCAGCACGGTGTGCTAATGAGAGCCTTTGCCCGGGCAATAGTACG  
GGCAGTGTGTAGCGGATTGAAAGACGCTGAATCACTGACAGGCATGAAGACTATCGATAGAGTCTGA  
TAGTGTCGCCGCCGACAGCGGATAGAGTCCACAGTCATTGAAGTGTTAATCCGCGATCAAGCTC

**Start End Score Predicted promoter sequences:**

96 141 0.89 GAATCACTGACAGGCATGAAGACTATCGATAGAGTCTGAT<sup>A</sup>GTGTCGCCG

129 174 0.86 GTCTGATAGTGTGCGCCGCCGACAGCGGATAGAGTCCACA<sup>G</sup>TcATTGAAG

**P17:**

GCCAGATCGACTGAAGGCACAAGGTCTTCAGGCCAAAGTGTTCCGGCGGGGTCGAATAGGGCCCG  
TCTCTTACACAAGGCAAC

**Start End Score Predicted promoter sequences:**

5 50 0.82 GATCGACTGAAGGCACAAGGTCTTCAGGCCAAAGTGTTCC<sup>G</sup>GCGGGGGT



**P18:**

AGCTTCAAGCGGCAAGCCACTAGCTTCAAGTAAGGGCAGAAGCGATACGGAGTGGTTGATAGGCTTC  
GGGCGGGCTTGCAACTTGC GGCTTGAAGCTTGCCGCTGCTCCTAGTATGTGATTTCTAATTTTTCTCCC  
TAGGGTGTACCCAAGCCTGCATTCCGTGGGCGTTTCCGCTAACTGTC

**Start End Score Predicted promoter sequences:**

95 140 0.85 GCTTGCCGCTGCTCCTAGTATGTGATTTCTAATTTTTCTCCCTAGGGTGT

**P20:**

CAGGACGAACCTAGCTGAACTCGGTCTGTCTGAGTTAACAATTGTTAAGACTCAGCCGTGACAGTTAC  
GCGCGCCCGGCGTCTAATGGATCAGGATACCTCT

**Start End Score Predicted promoter sequences:**

52 97 0.92 TCAGCCGTGACAGTTACGCGCGCCCGGCGTCTAATGGATCAGGATACCTC

**P23:**

TAGTCGTCATATGGCGGCAACGCCGTGGAAAGCTGGCTGAAAGCTTTCTACGGCATGCTGTACCCAC  
ACGGCGCACCTGCCTGCAGGGGCTACCCGCCAGCGCCGTGCCATCTCCTCGTGACCTTAGGGTCTGC  
GCCAGCTACCCGGCCGGTGCTTCGAGCGGGGCCAAACGCCCGCCATTTCCCTCCCATTTCTGATT  
TCATCTCAACTGGCCATCATTGCGTAACGAAAAGTTCGGACTATGGTGTGTCAGGACGGTCGCCTTGCCG  
CGCCCGCCAGAGCTGCAGTCCTGAGGCTTATCAGGTGCTCGACAACGTTACTACACGGATGTGCGTT  
GACGAATCCTGACTGTTGACTCAAGTCAGGATGTTCTGCTCGCCAAACGCGCTCAATACCTATGTCTCC  
CTGTGATAC

**Start End Score Predicted promoter sequences:**

216 261 0.57 GCCATCATTGCGTAACGAAAAGTTCGGACTATGGTGTGTCAGGACGGTCGCC

331 376 0.55 ATGTGCGTTGACGAATCCTGACTGTTGACTCAAGTCAGGATGTTCTGCTC

**P25:**

GCGCAGAGGGTCCTCGACAGACAGGCTTGCTTCAAAAAGAGAAACATTATCATCTAGAGATGCATTT  
GAAGCAATGGACAAAACACCGCAGCAGAGCCCGTCGATCTATTGAGCCAGGTCAAAAAGTGGATTGT  
TGCTTGGCTTAGCATTGATTCCAGCCAAGACACACAACCGACTC

**Start End Score Predicted promoter sequences:**

19 64 0.51 AGACAGGCTTGCTTCAAAAAGAGAAACATTATCATCTAGAGATGCATTTG

**P29:**

GCACGGTTAGCCTGTTTGAACCAGAAGGGCTCCCGCGGGAGCCCTTTTTTGTGCCCGTCCGCCAGGTT  
TGAGGGGGATTCTCTCGCTGCGCCCGGGCGGGGATGTAGCGTCAGCGGGGACGTTCTCGCCTCG  
TCTTGCCTAGCTGCCAGGCACTTTGCTTGTCCCTTTACGGATGACCTTCGCTCGACCTTTTTCGTCT  
TGGGACATGCCCTGTACGGCAGTACCTAAAGATCATGCAAATTGCCCGAGAGATTTTTTCAGACTCGG  
CGAAATGCAATTTAAAGCCTTCTTTGATTGATTCTAAGTTATTGTTTTTAAAGAATTTATAAGTTTTT  
TAAAAACTGGCACAGCGCTTGCAGATAGTACTGGTGAACCTGCAGCCAGGAGTTGGTTTGCAGATTGT

CTGGAATGTAC

| Start | End | Score | Predicted promoter sequences:                               |
|-------|-----|-------|-------------------------------------------------------------|
| 255   | 300 | 1.00  | AGATTTTTTCAGACTCGGGCGAAATGCAATTAAAAGCCTTC <b>TTTGATTGAT</b> |
| 295   | 340 | 0.88  | TTTGATTGATTCTAAGTTATTGTTTTTAAAGAATTATA <b>AGTTTTTTAA</b>    |
| 313   | 358 | 1.00  | TATTGTTTTTAAAGAATTATAAGTTTTTTAAAACTGGC <b>ACAGCGCTTG</b>    |
| 335   | 380 | 1.00  | AGTTTTTTAAAACTGGCACAGCGCTTGCGATAGTACTGG <b>TGAACCTGCA</b>   |

**Fig. S1** Cloned promoter sequences and predicted promoter sequences. Each cloned promoter sequences were submitted into the web-based promoter prediction platform (Neural Network Promoter Prediction, [http://www.fruitfly.org/seq\\_tools/promoter.html](http://www.fruitfly.org/seq_tools/promoter.html)) and then the predicted promoter sequences were shown and scored. The transcription start was shown in larger font.

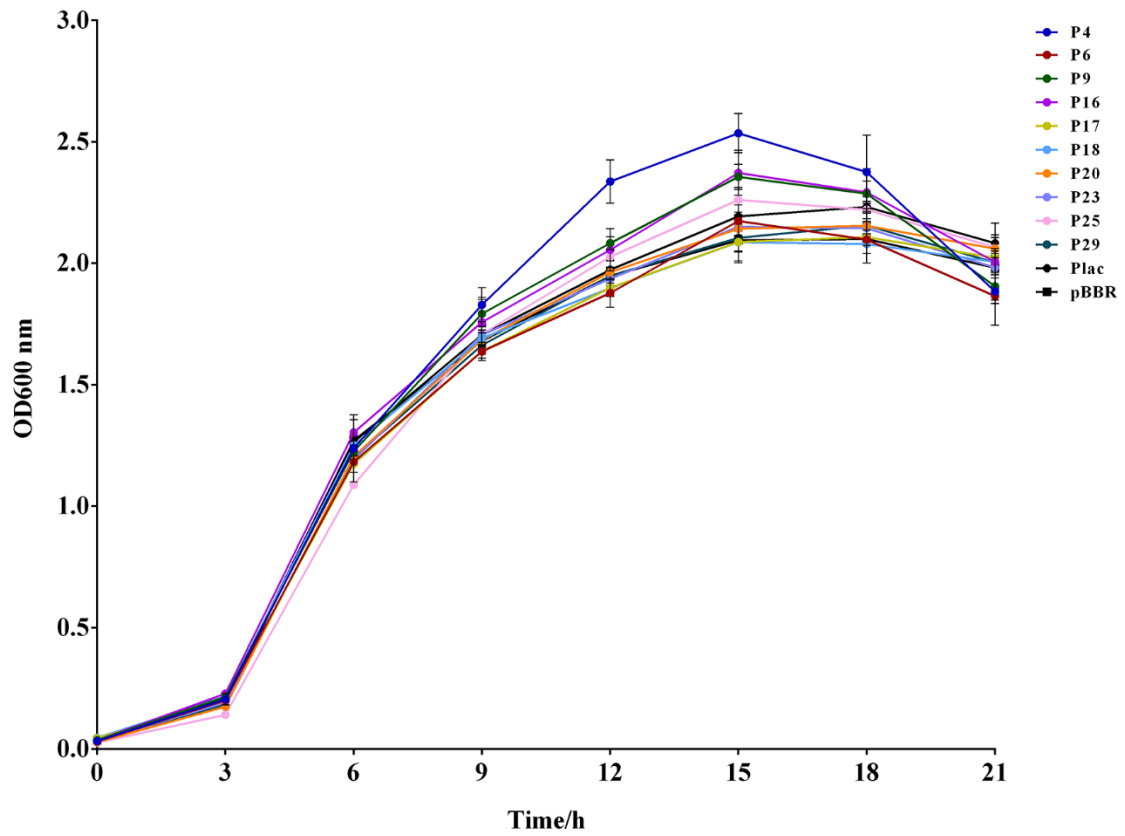

**Fig. S2** The growth curves of all the constructed strains for promoter characterization. Data represent the mean values  $\pm$  standard deviations of triplicate measurements from three independent experiments.

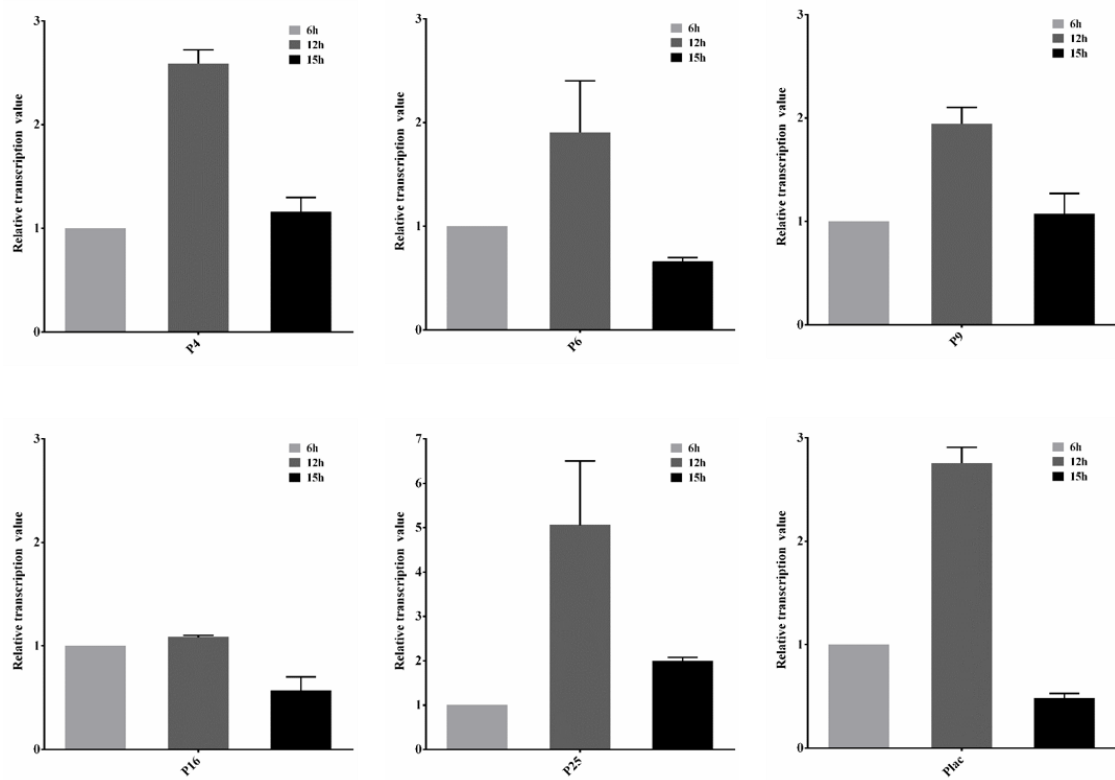

**Fig. S3** Transcriptional levels of the five strong promoters and *lac* promoter in different growth phases. The relative transcriptional value of each promoter in early log phase was set as 1. Data represent the mean values  $\pm$  standard deviations of triplicate measurements from three independent experiments.

**a****Standards**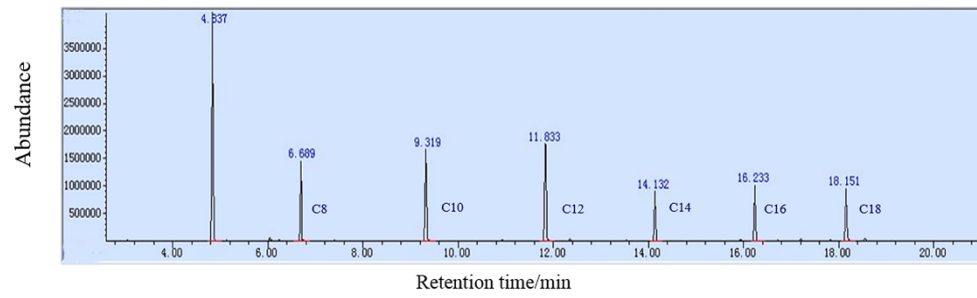**mcl-PHA for NKU**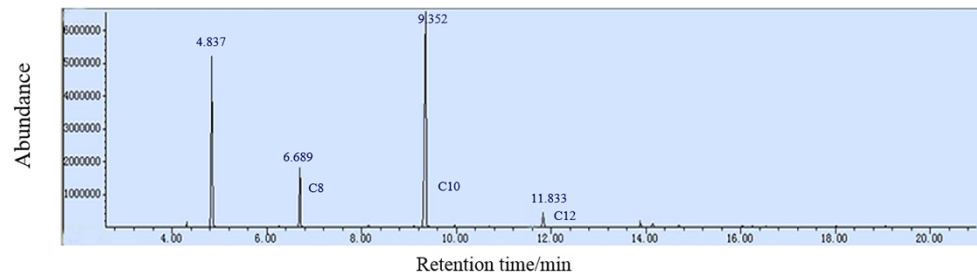**mcl-PHA for NKU- $\Delta$ phaZ**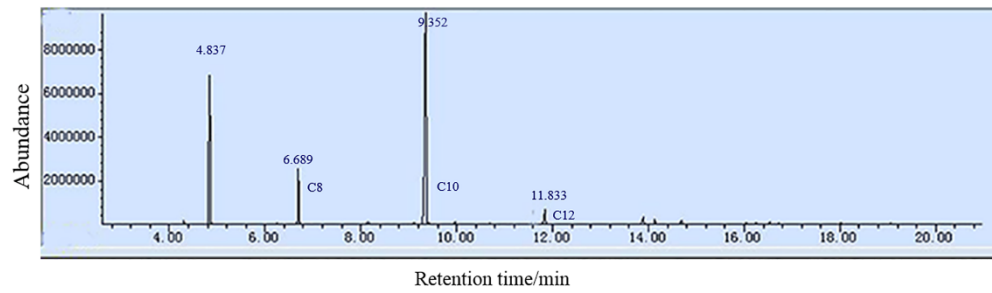**mcl-PHA for NKU- $\Delta$ phaZ-4C1**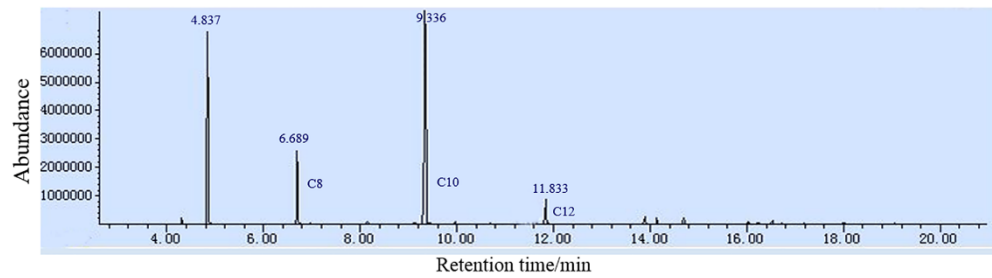**mcl-PHA for NKU- $\Delta$ phaZ-6C1**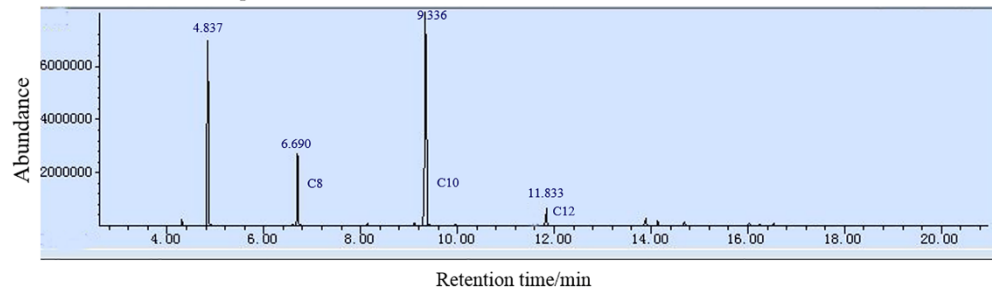**mcl-PHA for NKU- $\Delta$ phaZ-16C1**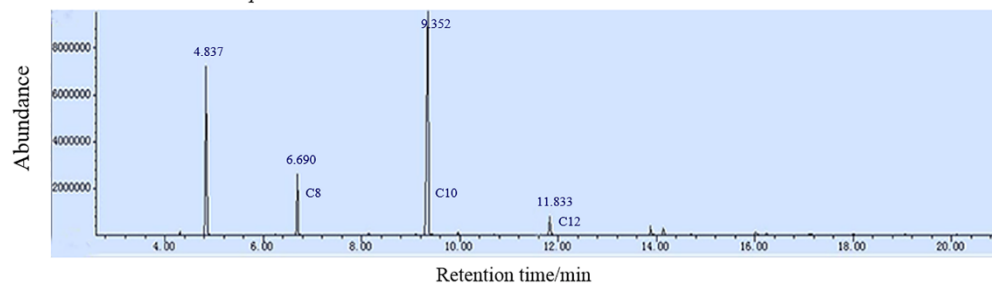

**b**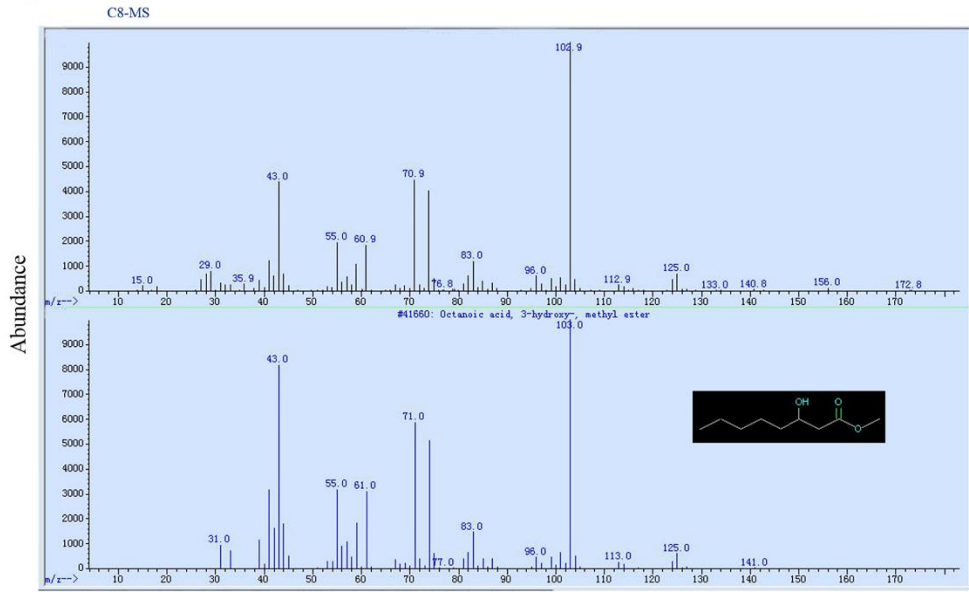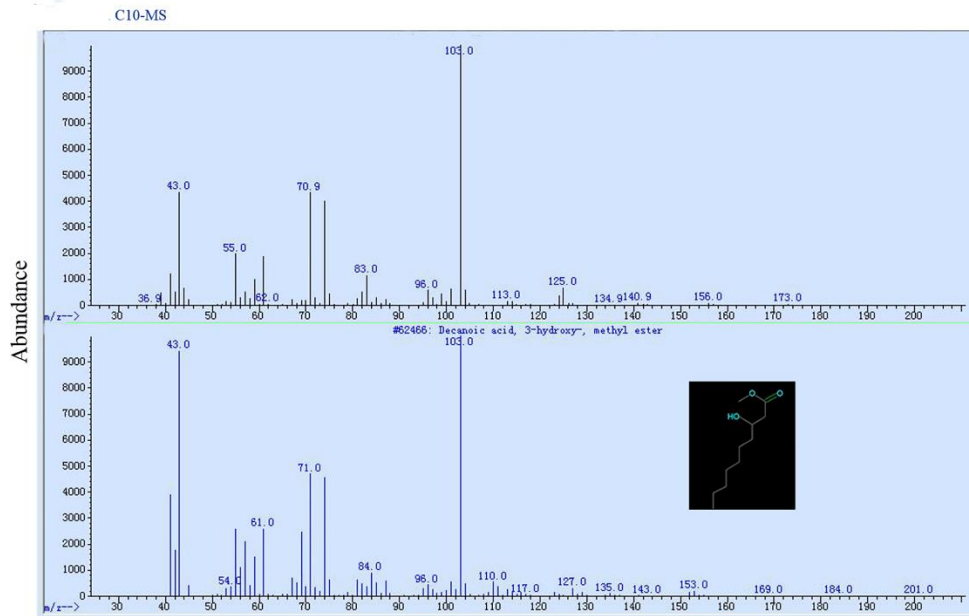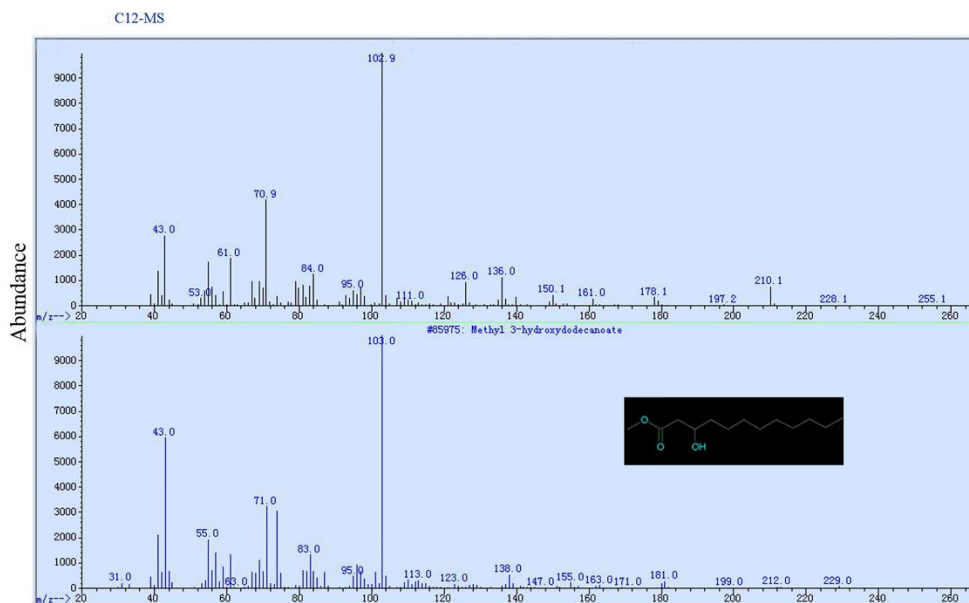

**Fig. S4** GC-MS analysis for the monomer compositions of mcl-PHAs synthesized by *P. mendocina* NKU and its mutants. (a) The chromatogram for the various standards of methyl-3-hydroxy fatty acids and for the various monomers generated by the acidolysis of mcl-PHA. (b) The mass spectra of the various monomers generated by the acidolysis of mcl-PHA. Prior to GC-MS analysis, mcl-PHA sample was pretreated with H<sub>2</sub>SO<sub>4</sub> and CH<sub>3</sub>OH at 100°C for the acidolysis and methyl esterification. The peak in 4.387 min was methyl benzoate which was acted as the internal reference.

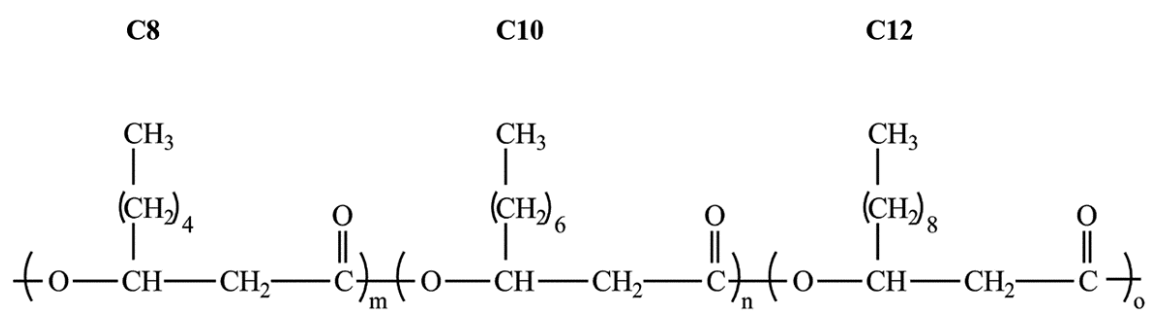

**Fig. S5** The molecular structure of mcl-PHA produced by *P. mendocina* NK-01



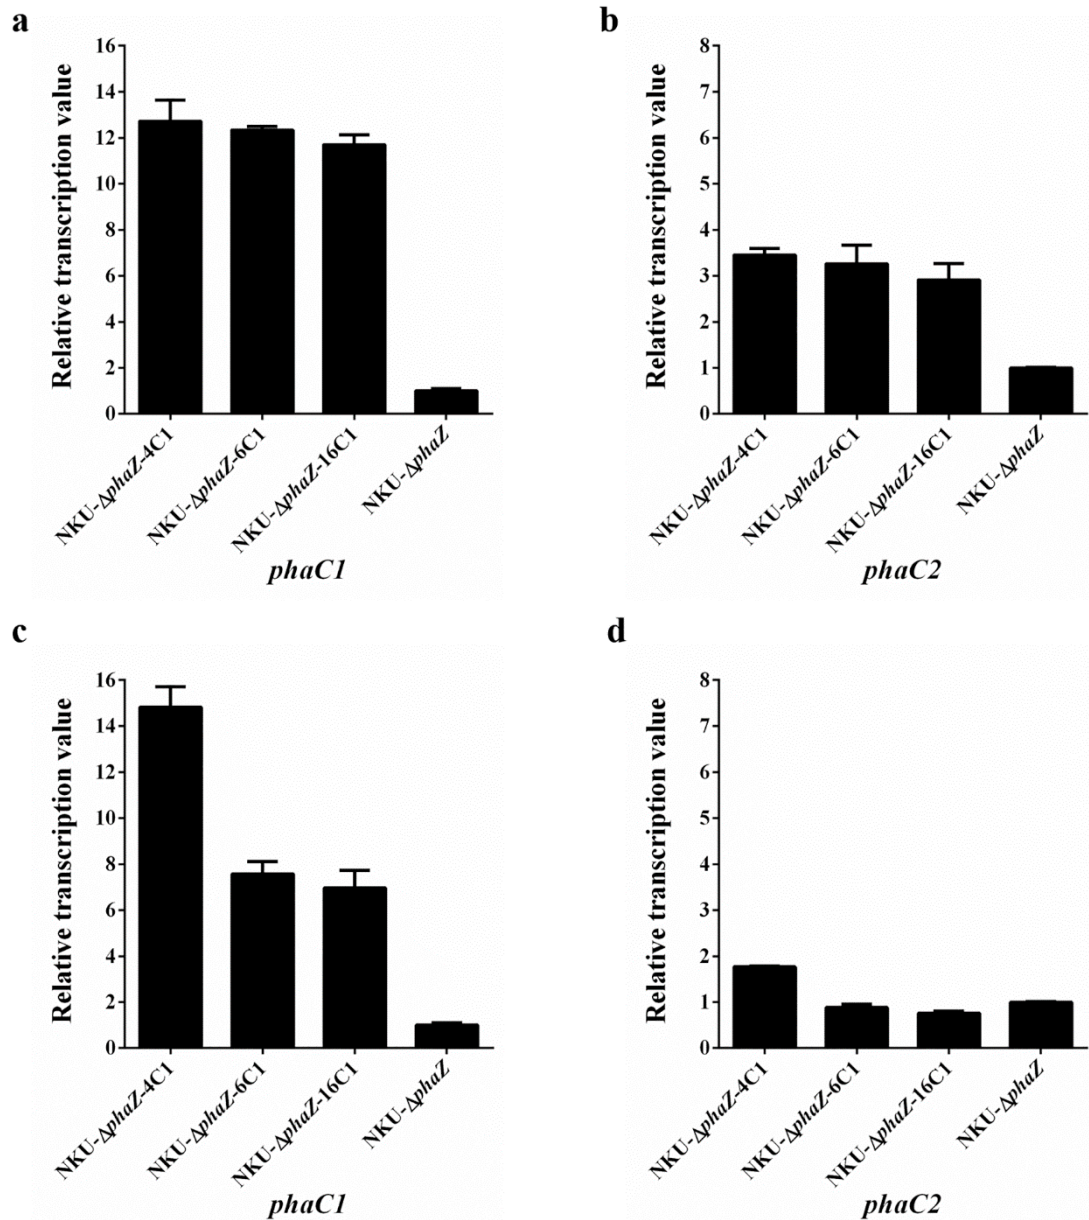

**Fig. S6** Transcriptional levels of *phaC1* and *phaC2* for the different mutant strains at 12 h and 24 h. (a) Transcriptional levels of *phaC1* in 12 h. (b) Transcriptional levels of *phaC2* in 12 h. (c) Transcriptional levels of *phaC1* in 24 h. (d) Transcriptional levels of *phaC2* in 24 h. The transcriptional level for strain NKU- $\Delta$ phaZ was set as 1. Data represent the mean values  $\pm$  standard deviations of triplicate measurements from three independent experiments.
